# Supplementary material for: Brain Structure in Acutely Underweight and Partially Weight-Restored Individuals with Anorexia Nervosa - A Coordinated Analysis by the ENIGMA Eating Disorders Working Group
Source: bioRxiv or medRxiv preprint supplement (doi:10.1101/2021.10.18.21264728), 2021-10-25
Supplement: Supplementary file [file media-3.pdf]

Overview moderator\* analyses

**Page 2: Subcortical**

Two-group case-control differences in a meta-regression with medication, AN subtype, depressive symptoms, duration of illness or tesla strength as an additional moderator

**Page 3: Subcortical**

Effect of the moderator

**Page 4-8: Surface area**

Two-group case-control differences in a meta-regression with medication, AN subtype, depressive symptoms, duration of illness or tesla strength as an additional moderator

**Page 9-13: Surface area**

Effect of the moderator

**Page 14-18: Cortical thickness**

Two-group case-control differences in a meta-regression with medication, AN subtype, depressive symptoms, duration of illness or tesla strength as an additional moderator

**Page 19-23: Cortical thickness**

Effect of the moderator

\* medication defined as the proportion of patients on antidepressive or antipsychotic medication;

Subtype = restrictive or binge-purge subtype;

Depressive symptoms as a continuous variable;

Duration of illness in years;

Tesla field strength either 3 or 1.5 tesla.

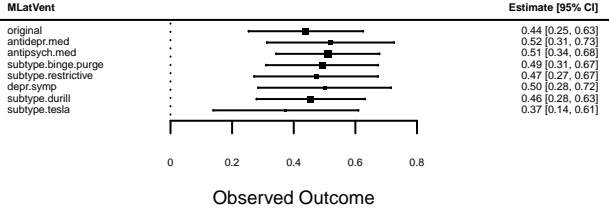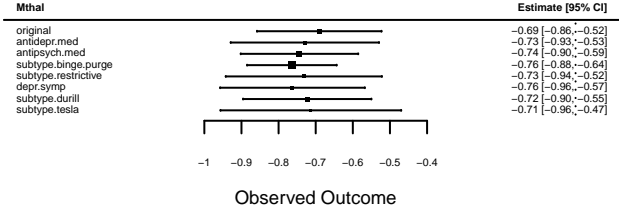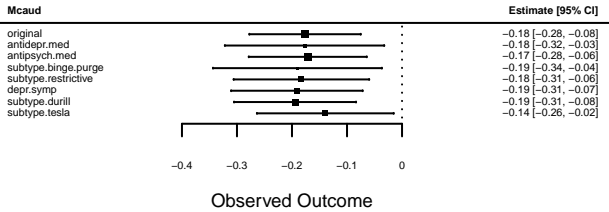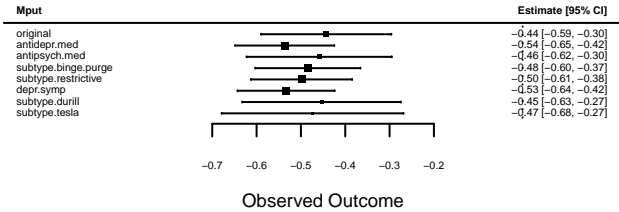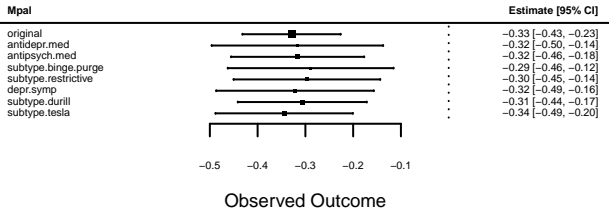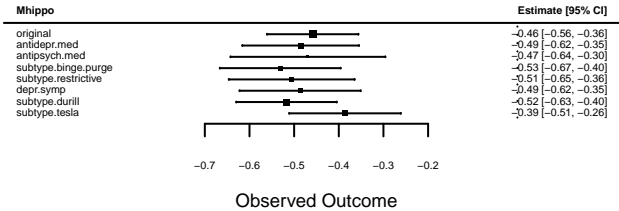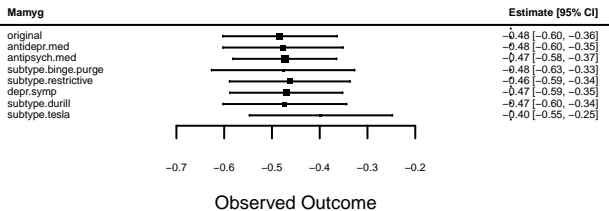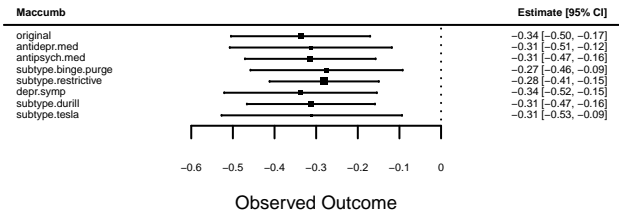

**MlatVent**

antidepr.med  
 antipsych.med  
 subtype.binge.purge  
 subtype.restrictive  
 depr.symp  
 subtype.durill  
 subtype.tesia

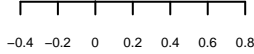

Observed Outcome

**Estimate [95% CI]**

0.02 [-0.17, 0.22]  
 0.12 [-0.03, 0.28]  
 -0.12 [-0.30, 0.07]  
 0.05 [-0.15, 0.25]  
 0.01 [-0.22, 0.23]  
 -0.05 [-0.24, 0.14]  
 0.28 [-0.10, 0.67]

**Mthal**

antidepr.med  
 antipsych.med  
 subtype.binge.purge  
 subtype.restrictive  
 depr.symp  
 subtype.durill  
 subtype.tesia

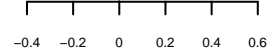

Observed Outcome

**Estimate [95% CI]**

-0.01 [-0.19, 0.17]  
 -0.05 [-0.19, 0.10]  
 0.14 [0.02, 0.26]  
 -0.06 [-0.27, 0.15]  
 -0.13 [-0.33, 0.08]  
 0.04 [-0.14, 0.23]  
 0.05 [-0.34, 0.45]

**Mcaud**

antidepr.med  
 antipsych.med  
 subtype.binge.purge  
 subtype.restrictive  
 depr.symp  
 subtype.durill  
 subtype.tesia

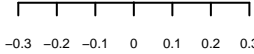

Observed Outcome

**Estimate [95% CI]**

-0.04 [-0.16, 0.09]  
 -0.04 [-0.13, 0.05]  
 0.06 [-0.10, 0.21]  
 -0.09 [-0.21, 0.02]  
 -0.11 [-0.24, 0.03]  
 0.03 [-0.10, 0.15]  
 -0.00 [-0.23, 0.23]

**Mput**

antidepr.med  
 antipsych.med  
 subtype.binge.purge  
 subtype.restrictive  
 depr.symp  
 subtype.durill  
 subtype.tesia

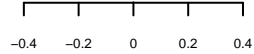

Observed Outcome

**Estimate [95% CI]**

0.05 [-0.03, 0.14]  
 -0.01 [-0.16, 0.15]  
 0.16 [0.04, 0.28]  
 -0.14 [-0.24, -0.03]  
 -0.14 [-0.27, -0.01]  
 0.05 [-0.14, 0.24]  
 0.04 [-0.29, 0.37]

**Mpal**

antidepr.med  
 antipsych.med  
 subtype.binge.purge  
 subtype.restrictive  
 depr.symp  
 subtype.durill  
 subtype.tesia

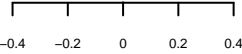

Observed Outcome

**Estimate [95% CI]**

0.03 [-0.13, 0.19]  
 -0.02 [-0.15, 0.10]  
 0.15 [-0.02, 0.33]  
 -0.15 [-0.30, -0.00]  
 -0.11 [-0.29, 0.07]  
 0.08 [-0.07, 0.22]  
 0.10 [-0.15, 0.35]

**Mhippo**

antidepr.med  
 antipsych.med  
 subtype.binge.purge  
 subtype.restrictive  
 depr.symp  
 subtype.durill  
 subtype.tesia

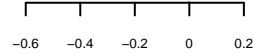

Observed Outcome

**Estimate [95% CI]**

-0.03 [-0.13, 0.08]  
 -0.10 [-0.26, 0.06]  
 -0.05 [-0.19, 0.09]  
 -0.02 [-0.16, 0.12]  
 0.01 [-0.14, 0.16]  
 -0.06 [-0.19, 0.06]  
 -0.27 [-0.51, -0.04]

**Manyg**

antidepr.med  
 antipsych.med  
 subtype.binge.purge  
 subtype.restrictive  
 depr.symp  
 subtype.durill  
 subtype.tesia

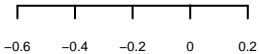

Observed Outcome

**Estimate [95% CI]**

-0.02 [-0.12, 0.08]  
 -0.04 [-0.14, 0.05]  
 0.01 [-0.15, 0.16]  
 -0.07 [-0.19, 0.05]  
 -0.04 [-0.17, 0.10]  
 0.02 [-0.12, 0.16]  
 -0.21 [-0.47, 0.06]

**Maccumb**

antidepr.med  
 antipsych.med  
 subtype.binge.purge  
 subtype.restrictive  
 depr.symp  
 subtype.durill  
 subtype.tesia

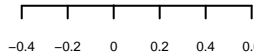

Observed Outcome

**Estimate [95% CI]**

-0.07 [-0.25, 0.11]  
 -0.11 [-0.26, 0.03]  
 0.19 [0.00, 0.37]  
 -0.25 [-0.38, -0.13]  
 -0.07 [-0.26, 0.12]  
 0.14 [-0.02, 0.31]  
 0.05 [-0.30, 0.41]

**M\_bankssts\_surfavg**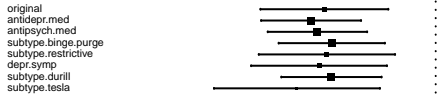

Observed Outcome

**Estimate [95% CI]**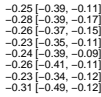**M\_caudalanteriorcingulate\_surfavg**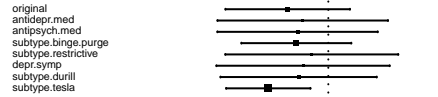

Observed Outcome

**Estimate [95% CI]**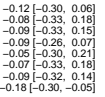**M\_caudalmiddlefrontal\_surfavg**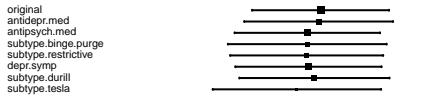

Observed Outcome

**Estimate [95% CI]**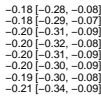**M\_cuneus\_surfavg**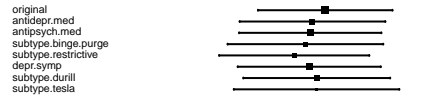

Observed Outcome

**Estimate [95% CI]**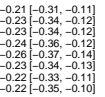**M\_entorhinal\_surfavg**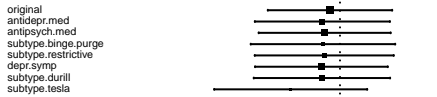

Observed Outcome

**Estimate [95% CI]**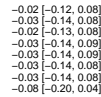**M\_fusiform\_surfavg**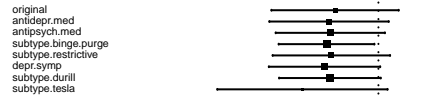

Observed Outcome

**Estimate [95% CI]**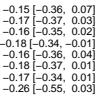**M\_inferiorparietal\_surfavg**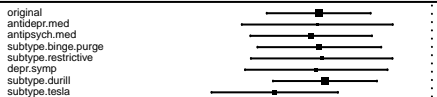

Observed Outcome

**Estimate [95% CI]**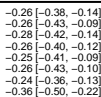**M\_inferiortemporal\_surfavg**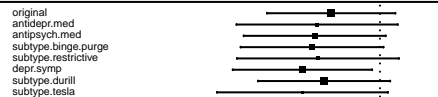

Observed Outcome

**Estimate [95% CI]**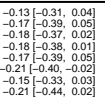

**M\_isthmuscingulate\_surfavg**

original  
antidepress.med  
antipsych.med  
subtype.binge.purge  
subtype.restrictive  
depr.symg  
subtype.durill  
subtype.testa

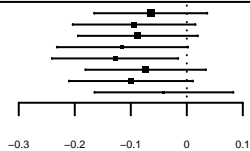

Observed Outcome

**Estimate [95% CI]**

-0.06 [-0.17, 0.04]  
-0.09 [-0.20, 0.02]  
-0.09 [-0.19, 0.02]  
-0.11 [-0.23, 0.00]  
-0.13 [-0.24, -0.02]  
-0.07 [-0.18, 0.03]  
-0.10 [-0.21, 0.01]  
-0.04 [-0.16, 0.08]

**M\_lateraloccipital\_surfavg**

original  
antidepress.med  
antipsych.med  
subtype.binge.purge  
subtype.restrictive  
depr.symg  
subtype.durill  
subtype.testa

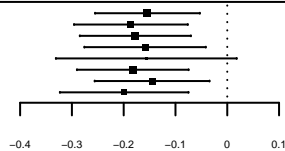

Observed Outcome

**Estimate [95% CI]**

-0.15 [-0.26, -0.05]  
-0.19 [-0.30, -0.08]  
-0.18 [-0.28, -0.07]  
-0.16 [-0.28, -0.04]  
-0.16 [-0.33, 0.02]  
-0.18 [-0.29, -0.07]  
-0.15 [-0.26, -0.03]  
-0.20 [-0.32, -0.07]

**M\_lateralorbitofrontal\_surfavg**

original  
antidepress.med  
antipsych.med  
subtype.binge.purge  
subtype.restrictive  
depr.symg  
subtype.durill  
subtype.testa

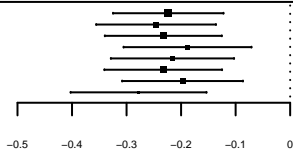

Observed Outcome

**Estimate [95% CI]**

-0.22 [-0.32, -0.12]  
-0.25 [-0.36, -0.14]  
-0.23 [-0.34, -0.13]  
-0.19 [-0.31, -0.07]  
-0.22 [-0.33, -0.10]  
-0.23 [-0.34, -0.12]  
-0.20 [-0.31, -0.09]  
-0.28 [-0.40, -0.15]

**M\_lingual\_surfavg**

original  
antidepress.med  
antipsych.med  
subtype.binge.purge  
subtype.restrictive  
depr.symg  
subtype.durill  
subtype.testa

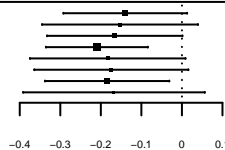

Observed Outcome

**Estimate [95% CI]**

-0.14 [-0.29, 0.01]  
-0.15 [-0.34, 0.04]  
-0.17 [-0.33, 0.00]  
-0.21 [-0.34, -0.08]  
-0.18 [-0.37, 0.01]  
-0.17 [-0.36, 0.02]  
-0.18 [-0.34, -0.03]  
-0.17 [-0.39, 0.06]

**M\_medialorbitofrontal\_surfavg**

original  
antidepress.med  
antipsych.med  
subtype.binge.purge  
subtype.restrictive  
depr.symg  
subtype.durill  
subtype.testa

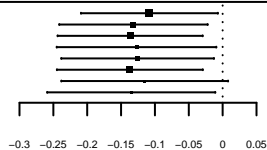

Observed Outcome

**Estimate [95% CI]**

-0.11 [-0.21, -0.01]  
-0.13 [-0.24, -0.02]  
-0.14 [-0.24, -0.03]  
-0.13 [-0.24, -0.01]  
-0.13 [-0.24, -0.01]  
-0.14 [-0.24, -0.03]  
-0.12 [-0.24, 0.01]  
-0.13 [-0.26, -0.01]

**M\_middletemporal\_surfavg**

original  
antidepress.med  
antipsych.med  
subtype.binge.purge  
subtype.restrictive  
depr.symg  
subtype.durill  
subtype.testa

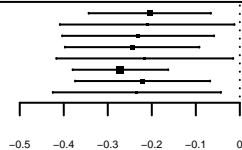

Observed Outcome

**Estimate [95% CI]**

-0.20 [-0.34, -0.07]  
-0.21 [-0.41, -0.01]  
-0.23 [-0.40, -0.06]  
-0.24 [-0.40, -0.09]  
-0.22 [-0.42, -0.02]  
-0.27 [-0.38, -0.16]  
-0.22 [-0.37, -0.07]  
-0.23 [-0.42, -0.04]

**M parahippocampal\_surfavg**

original  
antidepress.med  
antipsych.med  
subtype.binge.purge  
subtype.restrictive  
depr.symg  
subtype.durill  
subtype.testa

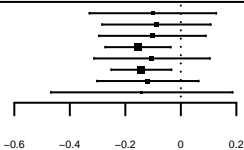

Observed Outcome

**Estimate [95% CI]**

-0.10 [-0.33, 0.13]  
-0.09 [-0.28, 0.11]  
-0.10 [-0.30, 0.09]  
-0.15 [-0.27, -0.04]  
-0.10 [-0.31, 0.10]  
-0.14 [-0.25, -0.03]  
-0.12 [-0.30, 0.06]  
-0.14 [-0.47, 0.19]

**M paracentral\_surfavg**

original  
antidepress.med  
antipsych.med  
subtype.binge.purge  
subtype.restrictive  
depr.symg  
subtype.durill  
subtype.testa

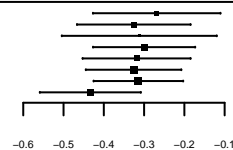

Observed Outcome

**Estimate [95% CI]**

-0.27 [-0.43, -0.11]  
-0.33 [-0.47, -0.18]  
-0.31 [-0.50, -0.12]  
-0.30 [-0.43, -0.17]  
-0.32 [-0.45, -0.18]  
-0.33 [-0.46, -0.21]  
-0.31 [-0.43, -0.20]  
-0.43 [-0.56, -0.31]

**M\_parsopercularis\_surfavg**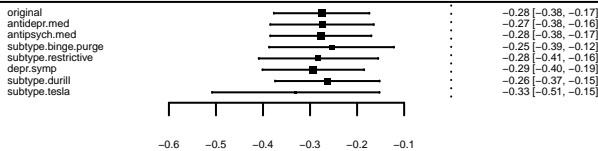

Observed Outcome

**Estimate [95% CI]****M\_parsorbitalis\_surfavg**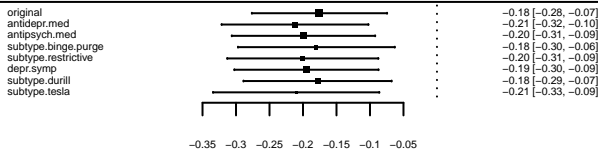

Observed Outcome

**Estimate [95% CI]****M\_parstriangularis\_surfavg**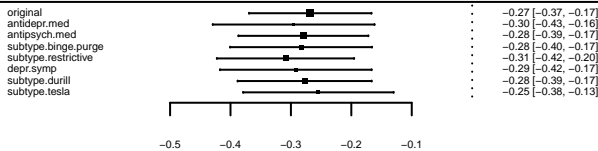

Observed Outcome

**Estimate [95% CI]****M\_pericalcarine\_surfavg**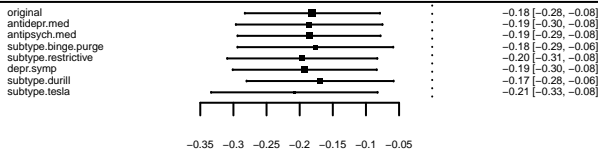

Observed Outcome

**Estimate [95% CI]****M\_postcentral\_surfavg**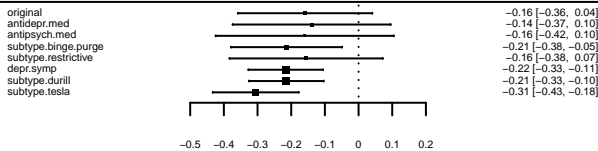

Observed Outcome

**Estimate [95% CI]****M\_posteriorcingulate\_surfavg**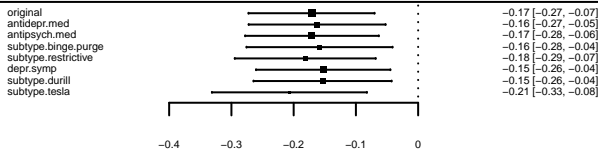

Observed Outcome

**Estimate [95% CI]****M\_precentral\_surfavg**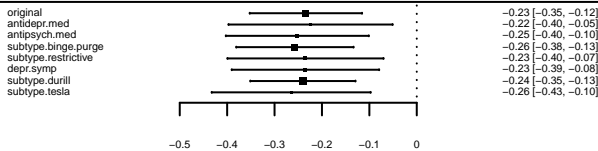

Observed Outcome

**Estimate [95% CI]****M\_preceuneus\_surfavg**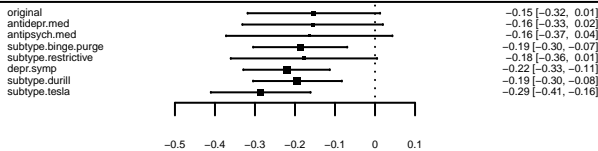

Observed Outcome

**Estimate [95% CI]**

**M\_rostralanteriorcingulate\_surfvag**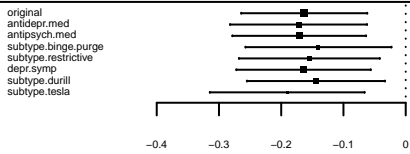

Observed Outcome

**Estimate [95% CI]****M\_rostralmiddlefrontal\_surfvag**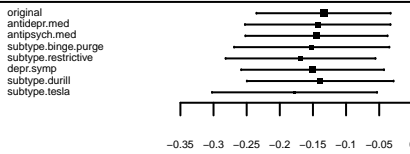

Observed Outcome

**Estimate [95% CI]****M\_superiorfrontal\_surfvag**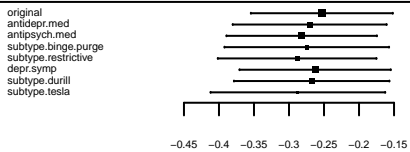

Observed Outcome

**Estimate [95% CI]****M\_superioparietal\_surfvag**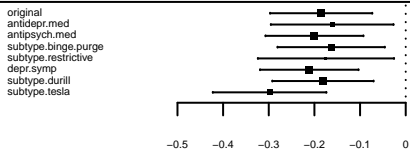

Observed Outcome

**Estimate [95% CI]****M\_superiortemporal\_surfvag**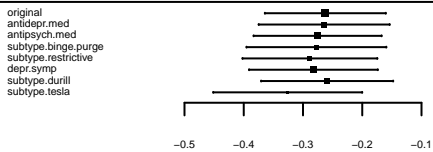

Observed Outcome

**Estimate [95% CI]****M\_supramarginal\_surfvag**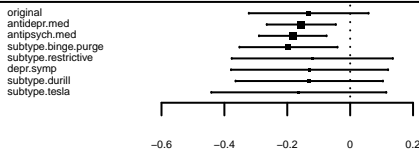

Observed Outcome

**Estimate [95% CI]****M\_frontalpole\_surfvag**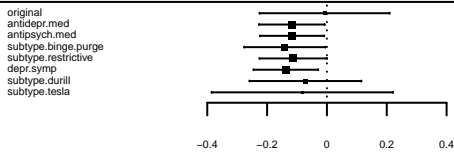

Observed Outcome

**Estimate [95% CI]****M\_temporalpole\_surfvag**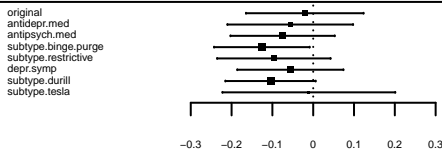

Observed Outcome

**Estimate [95% CI]**

**M\_transversetemporal\_surfvag**

|                     | Estimate [95% CI]    |
|---------------------|----------------------|
| original            | -0.29 [-0.42, -0.15] |
| antidepress.med     | -0.33 [-0.44, -0.22] |
| antipsych.med       | -0.35 [-0.45, -0.24] |
| subtype.binge.purge | -0.32 [-0.44, -0.21] |
| subtype.restrictive | -0.34 [-0.45, -0.22] |
| depr.symg           | -0.36 [-0.47, -0.25] |
| subtype.durill      | -0.31 [-0.42, -0.20] |
| subtype.tesla       | -0.40 [-0.55, -0.26] |

-0.6 -0.5 -0.4 -0.3 -0.2 -0.1

Observed Outcome

**M\_insula\_surfvag**

|                     | Estimate [95% CI]    |
|---------------------|----------------------|
| original            | -0.15 [-0.34, 0.04]  |
| antidepress.med     | -0.16 [-0.37, 0.06]  |
| antipsych.med       | -0.15 [-0.35, 0.06]  |
| subtype.binge.purge | -0.23 [-0.40, -0.07] |
| subtype.restrictive | -0.18 [-0.42, 0.06]  |
| depr.symg           | -0.24 [-0.34, -0.13] |
| subtype.durill      | -0.17 [-0.39, 0.05]  |
| subtype.tesla       | -0.21 [-0.49, 0.07]  |

-0.5 -0.4 -0.3 -0.2 -0.1 0 0.1

Observed Outcome



**M\_bankssts\_surfvag**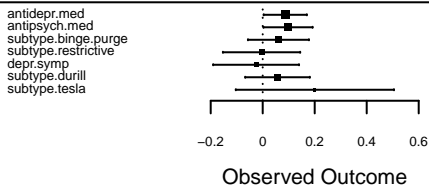**Estimate [95% CI]**

|                     |
|---------------------|
| 0.09 [0.00, 0.17]   |
| 0.10 [0.00, 0.19]   |
| 0.06 [-0.06, 0.18]  |
| -0.00 [-0.15, 0.14] |
| -0.03 [-0.19, 0.14] |
| 0.06 [-0.07, 0.18]  |
| 0.20 [-0.10, 0.50]  |

**M\_caudalanteriorcingulate\_surfvag**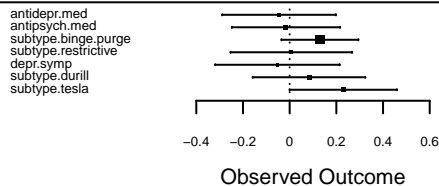**Estimate [95% CI]**

|                     |
|---------------------|
| -0.05 [-0.29, 0.20] |
| -0.02 [-0.25, 0.22] |
| 0.13 [-0.04, 0.29]  |
| 0.01 [-0.25, 0.27]  |
| -0.05 [-0.32, 0.21] |
| 0.08 [-0.16, 0.32]  |
| 0.23 [-0.00, 0.46]  |

**M\_caudalmiddlefrontal\_surfvag**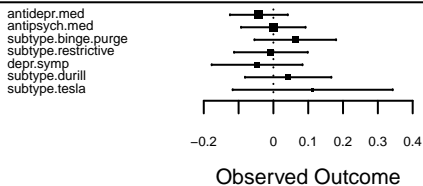**Estimate [95% CI]**

|                     |
|---------------------|
| -0.04 [-0.12, 0.04] |
| -0.00 [-0.09, 0.09] |
| 0.06 [-0.05, 0.18]  |
| -0.01 [-0.11, 0.10] |
| -0.05 [-0.18, 0.08] |
| 0.04 [-0.08, 0.17]  |
| 0.11 [-0.12, 0.34]  |

**M\_cuneus\_surfvag**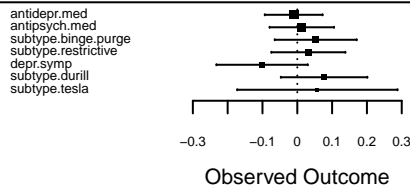**Estimate [95% CI]**

|                     |
|---------------------|
| -0.01 [-0.09, 0.07] |
| 0.01 [-0.08, 0.11]  |
| 0.05 [-0.06, 0.17]  |
| 0.03 [-0.07, 0.14]  |
| -0.10 [-0.23, 0.03] |
| 0.08 [-0.05, 0.20]  |
| 0.06 [-0.17, 0.29]  |

**M\_entorhinal\_surfvag**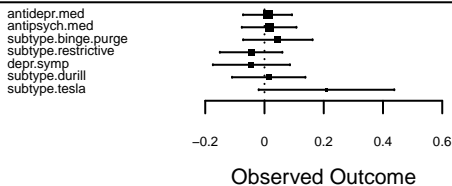**Estimate [95% CI]**

|                     |
|---------------------|
| 0.01 [-0.07, 0.09]  |
| 0.02 [-0.08, 0.11]  |
| 0.05 [-0.07, 0.16]  |
| -0.05 [-0.15, 0.06] |
| -0.04 [-0.17, 0.09] |
| 0.01 [-0.11, 0.14]  |
| 0.21 [-0.02, 0.44]  |

**M\_fusiform\_surfvag**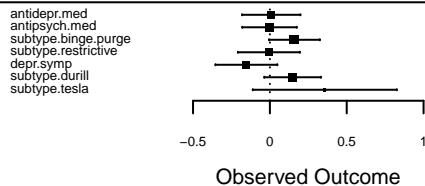**Estimate [95% CI]**

|                     |
|---------------------|
| 0.01 [-0.18, 0.20]  |
| -0.00 [-0.18, 0.17] |
| 0.16 [-0.01, 0.33]  |
| -0.01 [-0.21, 0.20] |
| -0.15 [-0.35, 0.05] |
| 0.15 [-0.04, 0.33]  |
| 0.36 [-0.11, 0.83]  |

**M\_inferioparietal\_surfvag**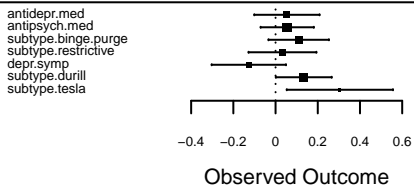**Estimate [95% CI]**

|                     |
|---------------------|
| 0.05 [-0.10, 0.21]  |
| 0.06 [-0.07, 0.18]  |
| 0.11 [-0.03, 0.25]  |
| 0.03 [-0.13, 0.19]  |
| -0.13 [-0.30, 0.05] |
| 0.13 [0.00, 0.27]   |
| 0.30 [0.05, 0.56]   |

**M\_inferiortemporal\_surfvag**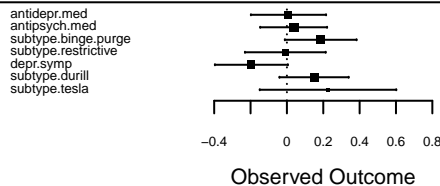**Estimate [95% CI]**

|                     |
|---------------------|
| 0.01 [-0.20, 0.22]  |
| 0.04 [-0.15, 0.22]  |
| 0.19 [-0.01, 0.38]  |
| -0.01 [-0.23, 0.21] |
| -0.20 [-0.40, 0.01] |
| 0.15 [-0.04, 0.34]  |
| 0.23 [-0.15, 0.60]  |

**M\_isthmuscingulate\_surfavg**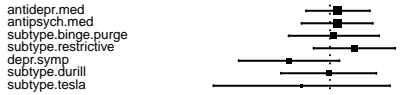

Observed Outcome

Observed Outcome

**Estimate [95% CI]****M\_lateraloccipital\_surfavg**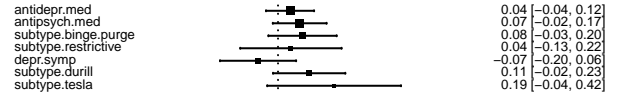

Observed Outcome

Observed Outcome

**Estimate [95% CI]****M\_lateralorbitofrontal\_surfavg**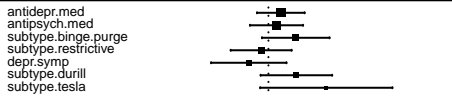

Observed Outcome

Observed Outcome

**Estimate [95% CI]****M\_lingual\_surfavg**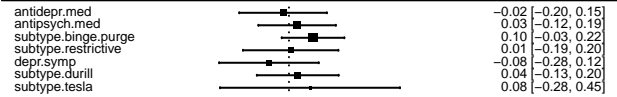

Observed Outcome

Observed Outcome

**Estimate [95% CI]****M\_medialorbitofrontal\_surfavg**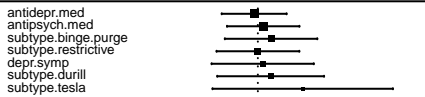

Observed Outcome

Observed Outcome

**Estimate [95% CI]****M\_middletemporal\_surfavg**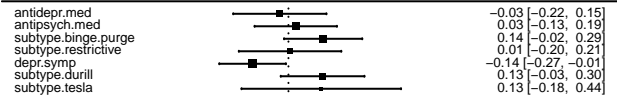

Observed Outcome

Observed Outcome

**Estimate [95% CI]****M\_parahippocampal\_surfavg**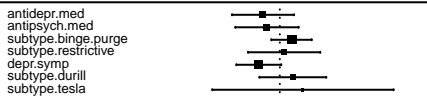

Observed Outcome

Observed Outcome

**Estimate [95% CI]****M\_paracentral\_surfavg**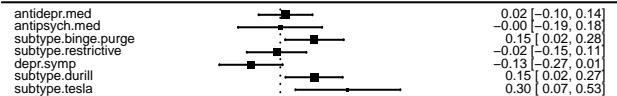

Observed Outcome

Observed Outcome

**Estimate [95% CI]**

**M\_parsopercularis\_surfavg**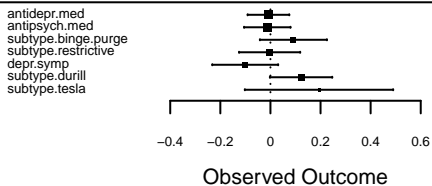**Estimate [95% CI]**

-0.01 [-0.09, 0.08]  
 -0.01 [-0.11, 0.08]  
 0.09 [-0.04, 0.23]  
 -0.00 [-0.13, 0.12]  
 -0.10 [-0.23, 0.03]  
 0.12 [-0.00, 0.25]  
 0.19 [-0.10, 0.49]

**M\_parsorbitalis\_surfavg**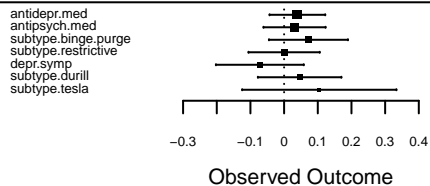**Estimate [95% CI]**

0.04 [-0.04, 0.12]  
 0.03 [-0.06, 0.12]  
 0.07 [-0.04, 0.19]  
 0.00 [-0.11, 0.11]  
 -0.07 [-0.20, 0.06]  
 0.05 [-0.08, 0.17]  
 0.10 [-0.12, 0.33]

**M\_parsotriangularis\_surfavg**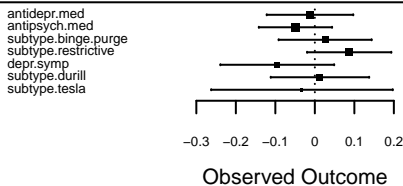**Estimate [95% CI]**

-0.01 [-0.12, 0.10]  
 -0.05 [-0.14, 0.04]  
 0.03 [-0.09, 0.14]  
 0.09 [-0.02, 0.19]  
 -0.10 [-0.24, 0.05]  
 0.01 [-0.11, 0.14]  
 -0.03 [-0.26, 0.20]

**M\_pericalcarine\_surfavg**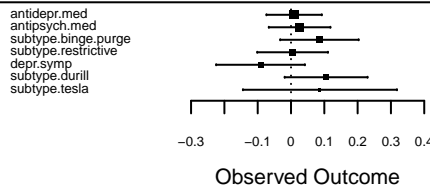**Estimate [95% CI]**

0.01 [-0.07, 0.09]  
 0.03 [-0.07, 0.12]  
 0.09 [-0.03, 0.20]  
 0.00 [-0.10, 0.11]  
 -0.09 [-0.22, 0.04]  
 0.11 [-0.02, 0.23]  
 0.09 [-0.14, 0.32]

**M\_postcentral\_surfavg**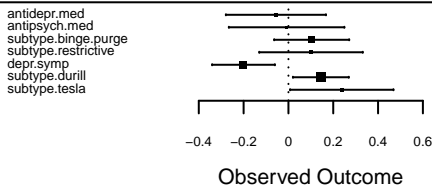**Estimate [95% CI]**

-0.06 [-0.28, 0.17]  
 -0.01 [-0.27, 0.25]  
 0.10 [-0.06, 0.27]  
 0.10 [-0.13, 0.33]  
 -0.20 [-0.34, -0.06]  
 0.14 [0.02, 0.27]  
 0.24 [0.01, 0.47]

**M\_posteriorcingulate\_surfavg**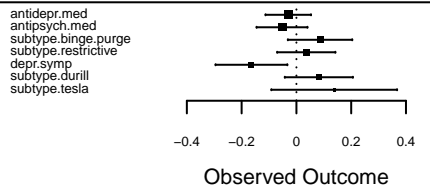**Estimate [95% CI]**

-0.03 [-0.11, 0.05]  
 -0.05 [-0.15, 0.04]  
 0.09 [-0.03, 0.20]  
 0.04 [-0.07, 0.14]  
 -0.16 [-0.30, -0.03]  
 0.08 [-0.04, 0.21]  
 0.14 [-0.09, 0.37]

**M\_precentral\_surfavg**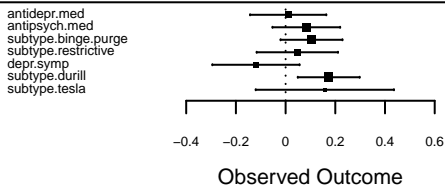**Estimate [95% CI]**

0.01 [-0.14, 0.16]  
 0.08 [-0.05, 0.22]  
 0.10 [-0.02, 0.23]  
 0.05 [-0.12, 0.21]  
 -0.12 [-0.29, 0.06]  
 0.17 [0.05, 0.30]  
 0.16 [-0.12, 0.44]

**M\_precuneus\_surfavg**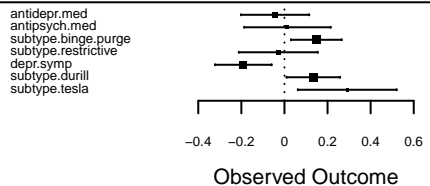**Estimate [95% CI]**

-0.04 [-0.20, 0.11]  
 0.01 [-0.19, 0.21]  
 0.15 [0.03, 0.27]  
 -0.03 [-0.21, 0.15]  
 -0.19 [-0.32, -0.06]  
 0.13 [0.01, 0.26]  
 0.29 [0.06, 0.52]

**M\_rostralanteriorcingulate\_surfavg**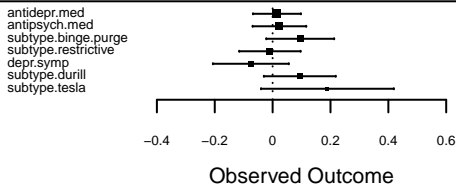**Estimate [95% CI]**

|                     |       |               |
|---------------------|-------|---------------|
| antidepr.med        | 0.01  | [-0.07, 0.10] |
| antipsych.med       | 0.02  | [-0.07, 0.12] |
| subtype.binge.purge | 0.10  | [-0.02, 0.21] |
| subtype.restrictive | -0.01 | [-0.12, 0.10] |
| depr.symp           | -0.08 | [-0.21, 0.06] |
| subtype.durill      | 0.09  | [-0.03, 0.22] |
| subtype.tesia       | 0.19  | [-0.04, 0.42] |

**M\_rostralmiddlefrontal\_surfavg**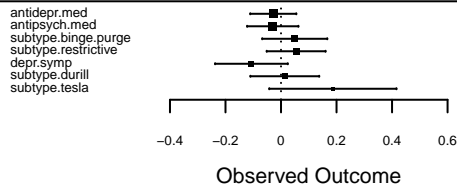**Estimate [95% CI]**

|                     |       |               |
|---------------------|-------|---------------|
| antidepr.med        | -0.03 | [-0.11, 0.06] |
| antipsych.med       | -0.03 | [-0.12, 0.06] |
| subtype.binge.purge | 0.05  | [-0.07, 0.17] |
| subtype.restrictive | 0.05  | [-0.05, 0.16] |
| depr.symp           | -0.11 | [-0.24, 0.02] |
| subtype.durill      | 0.01  | [-0.11, 0.14] |
| subtype.tesia       | 0.19  | [-0.04, 0.42] |

**M\_superiorfrontal\_surfavg**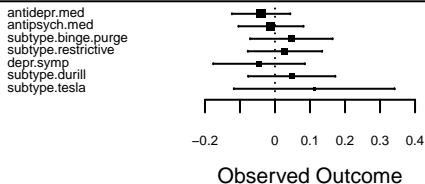**Estimate [95% CI]**

|                     |       |               |
|---------------------|-------|---------------|
| antidepr.med        | -0.04 | [-0.12, 0.04] |
| antipsych.med       | -0.01 | [-0.10, 0.08] |
| subtype.binge.purge | 0.05  | [-0.07, 0.16] |
| subtype.restrictive | 0.03  | [-0.06, 0.13] |
| depr.symp           | -0.05 | [-0.18, 0.09] |
| subtype.durill      | 0.05  | [-0.08, 0.17] |
| subtype.tesia       | 0.11  | [-0.12, 0.34] |

**M\_superiorparietal\_surfavg**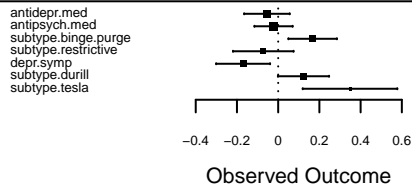**Estimate [95% CI]**

|                     |       |                |
|---------------------|-------|----------------|
| antidepr.med        | -0.05 | [-0.17, 0.06]  |
| antipsych.med       | -0.02 | [-0.12, 0.07]  |
| subtype.binge.purge | 0.17  | [0.05, 0.29]   |
| subtype.restrictive | -0.07 | [-0.22, 0.07]  |
| depr.symp           | -0.17 | [-0.30, -0.04] |
| subtype.durill      | 0.12  | [-0.00, 0.25]  |
| subtype.tesia       | 0.35  | [0.12, 0.58]   |

**M\_superiortemporal\_surfavg**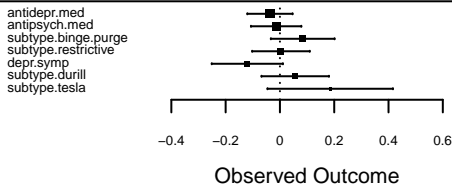**Estimate [95% CI]**

|                     |       |               |
|---------------------|-------|---------------|
| antidepr.med        | -0.04 | [-0.12, 0.05] |
| antipsych.med       | -0.01 | [-0.11, 0.08] |
| subtype.binge.purge | 0.08  | [-0.03, 0.20] |
| subtype.restrictive | 0.00  | [-0.10, 0.11] |
| depr.symp           | -0.12 | [-0.25, 0.01] |
| subtype.durill      | 0.06  | [-0.07, 0.18] |
| subtype.tesia       | 0.19  | [-0.05, 0.42] |

**M\_supramarginal\_surfavg**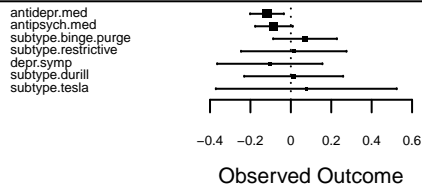**Estimate [95% CI]**

|                     |       |                |
|---------------------|-------|----------------|
| antidepr.med        | -0.12 | [-0.20, -0.03] |
| antipsych.med       | -0.08 | [-0.18, 0.01]  |
| subtype.binge.purge | 0.07  | [-0.09, 0.23]  |
| subtype.restrictive | 0.01  | [-0.25, 0.28]  |
| depr.symp           | -0.10 | [-0.36, 0.16]  |
| subtype.durill      | 0.01  | [-0.23, 0.26]  |
| subtype.tesia       | 0.08  | [-0.37, 0.52]  |

**M\_frontalpole\_surfavg**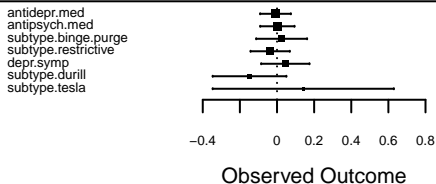**Estimate [95% CI]**

|                     |       |               |
|---------------------|-------|---------------|
| antidepr.med        | -0.01 | [-0.09, 0.07] |
| antipsych.med       | 0.00  | [-0.09, 0.09] |
| subtype.binge.purge | 0.02  | [-0.11, 0.16] |
| subtype.restrictive | -0.04 | [-0.14, 0.07] |
| depr.symp           | 0.04  | [-0.09, 0.17] |
| subtype.durill      | -0.15 | [-0.35, 0.05] |
| subtype.tesia       | 0.14  | [-0.35, 0.63] |

**M\_temporalpole\_surfavg**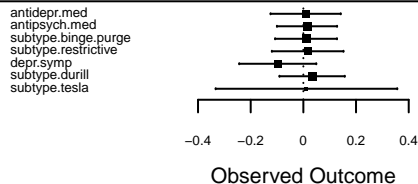**Estimate [95% CI]**

|                     |       |               |
|---------------------|-------|---------------|
| antidepr.med        | 0.01  | [-0.12, 0.14] |
| antipsych.med       | 0.01  | [-0.10, 0.13] |
| subtype.binge.purge | 0.01  | [-0.11, 0.13] |
| subtype.restrictive | 0.02  | [-0.12, 0.13] |
| depr.symp           | -0.10 | [-0.24, 0.05] |
| subtype.durill      | 0.03  | [-0.09, 0.16] |
| subtype.tesia       | 0.01  | [-0.33, 0.36] |

**M\_transversetemporal\_surfvag**

antidepr.med  
antipsych.med  
subtype.binge.purge  
subtype.restrictive  
depr.symp  
subtype.durill  
subtype.tesia

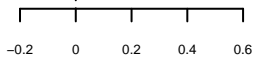

Observed Outcome

**Estimate [95% CI]**

-0.06 [-0.14, 0.03]  
-0.03 [-0.12, 0.06]  
0.08 [-0.04, 0.19]  
-0.02 [-0.12, 0.09]  
-0.04 [-0.17, 0.09]  
0.05 [-0.08, 0.17]  
0.23 [-0.03, 0.48]

**M\_insula\_surfvag**

antidepr.med  
antipsych.med  
subtype.binge.purge  
subtype.restrictive  
depr.symp  
subtype.durill  
subtype.tesia

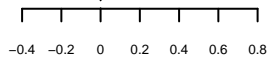

Observed Outcome

**Estimate [95% CI]**

-0.03 [-0.24, 0.18]  
-0.03 [-0.22, 0.17]  
0.10 [-0.07, 0.27]  
0.08 [-0.16, 0.33]  
-0.17 [-0.30, -0.04]  
0.07 [-0.16, 0.30]  
0.18 [-0.27, 0.62]

**M\_bankssts\_thickavg**

original  
antidepress.med  
antipsych.med  
subtype.binge.purge  
subtype.restrictive  
depr.symg  
subtype.durill  
subtype.testa

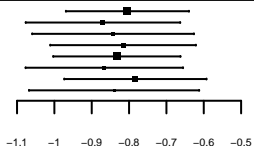

Observed Outcome

**Estimate [95% CI]**

-0.80 [-0.97, -0.64]  
-0.87 [-1.08, -0.66]  
-0.84 [-1.06, -0.63]  
-0.82 [-1.01, -0.62]  
-0.83 [-1.00, -0.66]  
-0.87 [-1.08, -0.66]  
-0.78 [-0.97, -0.59]  
-0.84 [-1.07, -0.61]

**M\_caudalanteriorcingulate\_thickavg**

original  
antidepress.med  
antipsych.med  
subtype.binge.purge  
subtype.restrictive  
depr.symg  
subtype.durill  
subtype.testa

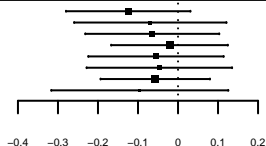

Observed Outcome

**Estimate [95% CI]**

-0.12 [-0.28, 0.03]  
-0.07 [-0.26, 0.12]  
-0.06 [-0.23, 0.10]  
-0.02 [-0.17, 0.12]  
-0.06 [-0.22, 0.11]  
-0.08 [-0.23, 0.14]  
-0.06 [-0.19, 0.08]  
-0.10 [-0.32, 0.13]

**M\_caudalmiddlefrontal\_thickavg**

original  
antidepress.med  
antipsych.med  
subtype.binge.purge  
subtype.restrictive  
depr.symg  
subtype.durill  
subtype.testa

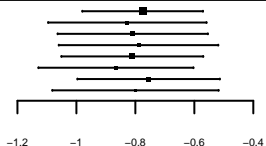

Observed Outcome

**Estimate [95% CI]**

-0.78 [-0.98, -0.57]  
-0.83 [-1.10, -0.56]  
-0.81 [-1.06, -0.55]  
-0.79 [-1.06, -0.52]  
-0.81 [-1.05, -0.57]  
-0.87 [-1.13, -0.60]  
-0.76 [-1.00, -0.51]  
-0.80 [-1.08, -0.52]

**M\_cuneus\_thickavg**

original  
antidepress.med  
antipsych.med  
subtype.binge.purge  
subtype.restrictive  
depr.symg  
subtype.durill  
subtype.testa

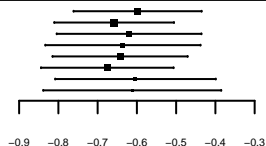

Observed Outcome

**Estimate [95% CI]**

-0.60 [-0.76, -0.44]  
-0.66 [-0.81, -0.51]  
-0.62 [-0.80, -0.44]  
-0.64 [-0.83, -0.44]  
-0.64 [-0.81, -0.47]  
-0.68 [-0.84, -0.51]  
-0.60 [-0.81, -0.40]  
-0.61 [-0.84, -0.39]

**M\_entorhinal\_thickavg**

original  
antidepress.med  
antipsych.med  
subtype.binge.purge  
subtype.restrictive  
depr.symg  
subtype.durill  
subtype.testa

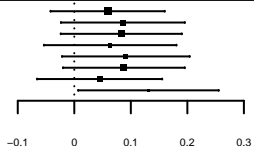

Observed Outcome

**Estimate [95% CI]**

0.06 [-0.04, 0.16]  
0.09 [-0.02, 0.20]  
0.08 [-0.02, 0.19]  
0.06 [-0.05, 0.18]  
0.09 [-0.02, 0.20]  
0.09 [-0.02, 0.20]  
0.04 [-0.07, 0.16]  
0.13 [0.01, 0.26]

**M\_fusiform\_thickavg**

original  
antidepress.med  
antipsych.med  
subtype.binge.purge  
subtype.restrictive  
depr.symg  
subtype.durill  
subtype.testa

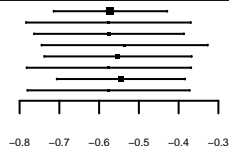

Observed Outcome

**Estimate [95% CI]**

-0.57 [-0.71, -0.43]  
-0.56 [-0.78, -0.37]  
-0.58 [-0.76, -0.39]  
-0.54 [-0.74, -0.33]  
-0.55 [-0.74, -0.37]  
-0.58 [-0.78, -0.37]  
-0.56 [-0.71, -0.38]  
-0.58 [-0.78, -0.37]

**M\_inferioparietal\_thickavg**

original  
antidepress.med  
antipsych.med  
subtype.binge.purge  
subtype.restrictive  
depr.symg  
subtype.durill  
subtype.testa

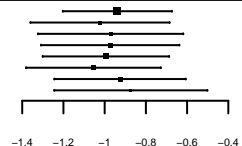

Observed Outcome

**Estimate [95% CI]**

-0.94 [-1.20, -0.67]  
-1.02 [-1.36, -0.69]  
-0.97 [-1.32, -0.62]  
-0.97 [-1.31, -0.64]  
-0.99 [-1.30, -0.69]  
-1.05 [-1.36, -0.73]  
-0.93 [-1.24, -0.61]  
-0.87 [-1.24, -0.50]

**M\_inferiotemporal\_thickavg**

original  
antidepress.med  
antipsych.med  
subtype.binge.purge  
subtype.restrictive  
depr.symg  
subtype.durill  
subtype.testa

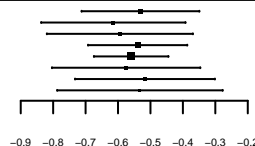

Observed Outcome

**Estimate [95% CI]**

-0.53 [-0.71, -0.35]  
-0.61 [-0.84, -0.39]  
-0.59 [-0.82, -0.37]  
-0.54 [-0.69, -0.39]  
-0.56 [-0.67, -0.44]  
-0.63 [-0.80, -0.35]  
-0.52 [-0.73, -0.30]  
-0.53 [-0.79, -0.28]

**M\_isthmuscingulate\_thickavg**

original  
antidepress.med  
antipsych.med  
subtype.binge.purge  
subtype.restrictive  
depr.symg  
subtype.durill  
subtype.testa

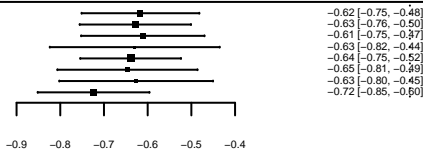

Observed Outcome

**Estimate [95% CI]****M\_lateraloccipital\_thickavg**

original  
antidepress.med  
antipsych.med  
subtype.binge.purge  
subtype.restrictive  
depr.symg  
subtype.durill  
subtype.testa

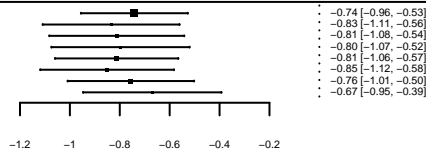

Observed Outcome

**Estimate [95% CI]****M\_lateralorbitofrontal\_thickavg**

original  
antidepress.med  
antipsych.med  
subtype.binge.purge  
subtype.restrictive  
depr.symg  
subtype.durill  
subtype.testa

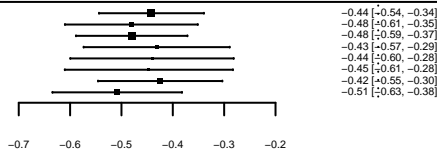

Observed Outcome

**Estimate [95% CI]****M\_lingual\_thickavg**

original  
antidepress.med  
antipsych.med  
subtype.binge.purge  
subtype.restrictive  
depr.symg  
subtype.durill  
subtype.testa

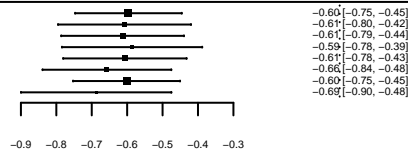

Observed Outcome

**Estimate [95% CI]****M\_medialorbitofrontal\_thickavg**

original  
antidepress.med  
antipsych.med  
subtype.binge.purge  
subtype.restrictive  
depr.symg  
subtype.durill  
subtype.testa

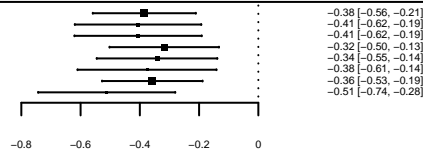

Observed Outcome

**Estimate [95% CI]****M\_middletemporal\_thickavg**

original  
antidepress.med  
antipsych.med  
subtype.binge.purge  
subtype.restrictive  
depr.symg  
subtype.durill  
subtype.testa

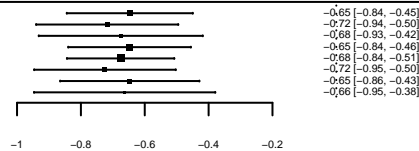

Observed Outcome

**Estimate [95% CI]****M\_parahippocampal\_thickavg**

original  
antidepress.med  
antipsych.med  
subtype.binge.purge  
subtype.restrictive  
depr.symg  
subtype.durill  
subtype.testa

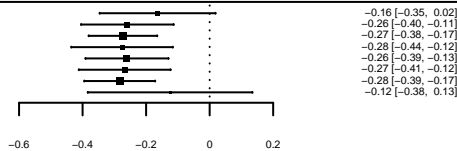

Observed Outcome

**Estimate [95% CI]****M\_paracentral\_thickavg**

original  
antidepress.med  
antipsych.med  
subtype.binge.purge  
subtype.restrictive  
depr.symg  
subtype.durill  
subtype.testa

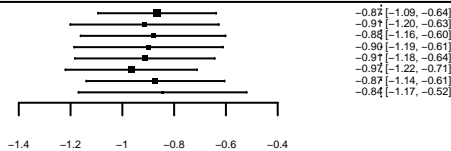

Observed Outcome

**Estimate [95% CI]**

**M\_parsopercularis\_thickavg**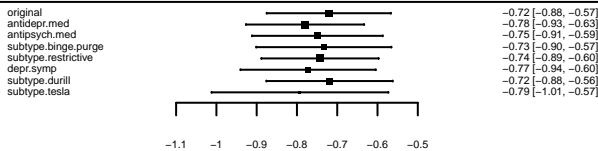

Observed Outcome

**M\_parsorbitalis\_thickavg**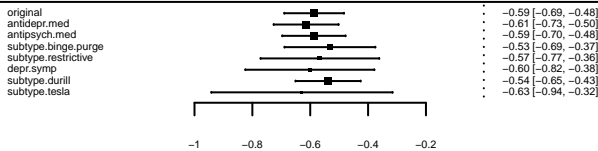

Observed Outcome

**M\_parstriangularis\_thickavg**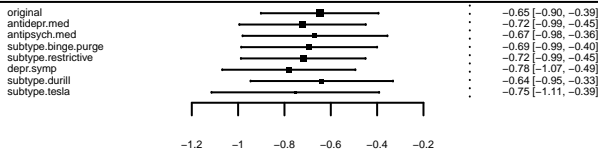

Observed Outcome

**M\_pericalcarine\_thickavg**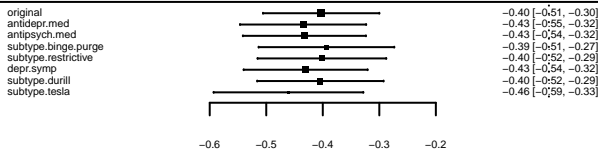

Observed Outcome

**M\_postcentral\_thickavg**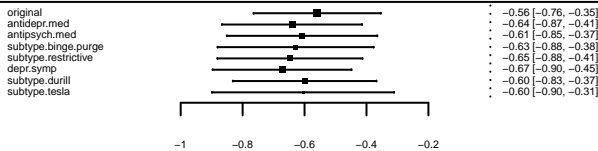

Observed Outcome

**M\_posteriorcingulate\_thickavg**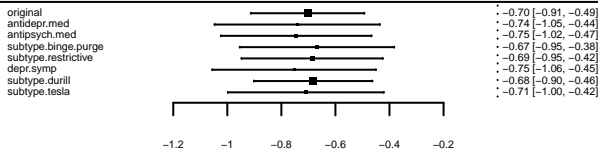

Observed Outcome

**M\_precentral\_thickavg**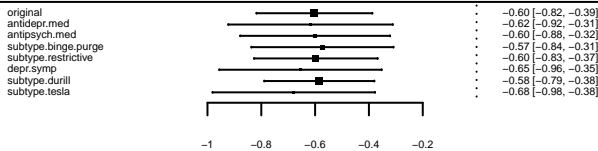

Observed Outcome

**M\_preuneus\_thickavg**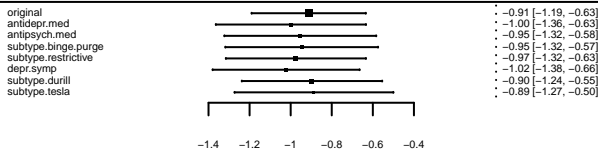

Observed Outcome



**M\_rostralanteriorcingulate\_thickavg**

|                     | Estimate [95% CI]   |
|---------------------|---------------------|
| original            | -0.06 [-0.21, 0.10] |
| antidepress.med     | -0.06 [-0.28, 0.15] |
| antipsych.med       | -0.05 [-0.26, 0.17] |
| subtype.binge.purge | -0.06 [-0.19, 0.07] |
| subtype.restrictive | -0.07 [-0.30, 0.15] |
| depr.symg           | -0.02 [-0.22, 0.18] |
| subtype.durill      | -0.07 [-0.26, 0.13] |
| subtype.testa       | -0.02 [-0.24, 0.21] |

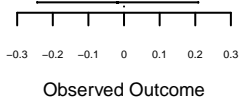

**Estimate [95% CI]**

**M\_rostralmiddlefrontal\_thickavg**

|                     | Estimate [95% CI]    |
|---------------------|----------------------|
| original            | -0.56 [-0.80, -0.32] |
| antidepress.med     | -0.66 [-0.93, -0.38] |
| antipsych.med       | -0.61 [-0.90, -0.32] |
| subtype.binge.purge | -0.58 [-0.81, -0.34] |
| subtype.restrictive | -0.61 [-0.83, -0.39] |
| depr.symg           | -0.66 [-0.93, -0.38] |
| subtype.durill      | -0.54 [-0.80, -0.29] |
| subtype.testa       | -0.61 [-0.95, -0.27] |

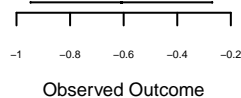

**Estimate [95% CI]**

**M\_superiorfrontal\_thickavg**

|                     | Estimate [95% CI]    |
|---------------------|----------------------|
| original            | -0.82 [-1.08, -0.56] |
| antidepress.med     | -0.85 [-1.15, -0.54] |
| antipsych.med       | -0.81 [-1.12, -0.50] |
| subtype.binge.purge | -0.81 [-1.13, -0.49] |
| subtype.restrictive | -0.85 [-1.14, -0.55] |
| depr.symg           | -0.92 [-1.23, -0.60] |
| subtype.durill      | -0.80 [-1.10, -0.50] |
| subtype.testa       | -0.83 [-1.21, -0.46] |

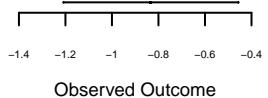

**Estimate [95% CI]**

**M\_superiorparietal\_thickavg**

|                     | Estimate [95% CI]    |
|---------------------|----------------------|
| original            | -0.96 [-1.20, -0.69] |
| antidepress.med     | -1.03 [-1.36, -0.71] |
| antipsych.med       | -1.00 [-1.32, -0.67] |
| subtype.binge.purge | -0.98 [-1.30, -0.66] |
| subtype.restrictive | -1.01 [-1.30, -0.71] |
| depr.symg           | -1.05 [-1.40, -0.73] |
| subtype.durill      | -0.93 [-1.23, -0.63] |
| subtype.testa       | -0.94 [-1.29, -0.59] |

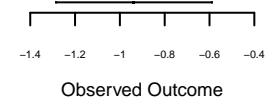

**Estimate [95% CI]**

**M\_superiortemporal\_thickavg**

|                     | Estimate [95% CI]    |
|---------------------|----------------------|
| original            | -0.52 [-0.71, -0.34] |
| antidepress.med     | -0.61 [-0.82, -0.40] |
| antipsych.med       | -0.57 [-0.81, -0.34] |
| subtype.binge.purge | -0.53 [-0.72, -0.34] |
| subtype.restrictive | -0.56 [-0.75, -0.38] |
| depr.symg           | -0.69 [-0.81, -0.37] |
| subtype.durill      | -0.53 [-0.74, -0.32] |
| subtype.testa       | -0.58 [-0.85, -0.31] |

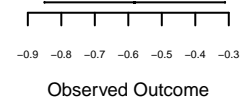

**Estimate [95% CI]**

**M\_supramarginal\_thickavg**

|                     | Estimate [95% CI]    |
|---------------------|----------------------|
| original            | -0.85 [-1.09, -0.61] |
| antidepress.med     | -0.90 [-1.16, -0.65] |
| antipsych.med       | -0.85 [-1.14, -0.57] |
| subtype.binge.purge | -0.87 [-1.15, -0.59] |
| subtype.restrictive | -0.90 [-1.16, -0.64] |
| depr.symg           | -0.95 [-1.22, -0.69] |
| subtype.durill      | -0.84 [-1.12, -0.55] |
| subtype.testa       | -0.86 [-1.20, -0.53] |

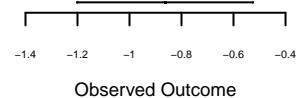

**Estimate [95% CI]**

**M\_frontalpole\_thickavg**

|                     | Estimate [95% CI]    |
|---------------------|----------------------|
| original            | -0.39 [-0.60, -0.19] |
| antidepress.med     | -0.44 [-0.67, -0.20] |
| antipsych.med       | -0.44 [-0.65, -0.23] |
| subtype.binge.purge | -0.37 [-0.59, -0.16] |
| subtype.restrictive | -0.39 [-0.51, -0.28] |
| depr.symg           | -0.40 [-0.62, -0.18] |
| subtype.durill      | -0.40 [-0.56, -0.24] |
| subtype.testa       | -0.37 [-0.67, -0.07] |

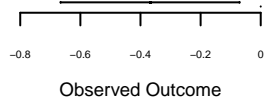

**Estimate [95% CI]**

**M\_temporalpole\_thickavg**

|                     | Estimate [95% CI]  |
|---------------------|--------------------|
| original            | 0.02 [-0.16, 0.20] |
| antidepress.med     | 0.02 [-0.21, 0.25] |
| antipsych.med       | 0.01 [-0.21, 0.24] |
| subtype.binge.purge | 0.11 [-0.08, 0.30] |
| subtype.restrictive | 0.06 [-0.19, 0.30] |
| depr.symg           | 0.04 [-0.18, 0.27] |
| subtype.durill      | 0.02 [-0.21, 0.25] |
| subtype.testa       | 0.02 [-0.24, 0.28] |

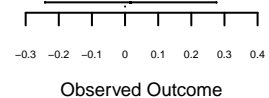

**Estimate [95% CI]**

**M\_transversetemporal\_thickavg**

|                     | Estimate [95% CI]    |
|---------------------|----------------------|
| original            | -0.26 [-0.46, -0.07] |
| antidepress.med     | -0.20 [-0.43, 0.02]  |
| antipsych.med       | -0.19 [-0.40, 0.02]  |
| subtype.binge.purge | -0.22 [-0.47, 0.04]  |
| subtype.restrictive | -0.25 [-0.50, 0.01]  |
| depr.symg           | -0.23 [-0.46, 0.01]  |
| subtype.durill      | -0.23 [-0.47, 0.01]  |
| subtype.testa       | -0.26 [-0.55, 0.02]  |

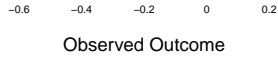**M\_insula\_thickavg**

|                     | Estimate [95% CI]    |
|---------------------|----------------------|
| original            | -0.33 [-0.52, -0.14] |
| antidepress.med     | -0.36 [-0.62, -0.09] |
| antipsych.med       | -0.35 [-0.59, -0.11] |
| subtype.binge.purge | -0.33 [-0.48, -0.17] |
| subtype.restrictive | -0.32 [-0.44, -0.21] |
| depr.symg           | -0.36 [-0.63, -0.09] |
| subtype.durill      | -0.36 [-0.60, -0.13] |
| subtype.testa       | -0.39 [-0.66, -0.13] |

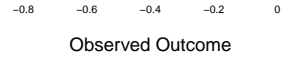**MThickness**

|                     | Estimate [95% CI]    |
|---------------------|----------------------|
| original            | -0.90 [-1.15, -0.65] |
| antidepress.med     | -0.96 [-1.27, -0.66] |
| antipsych.med       | -0.93 [-1.24, -0.61] |
| subtype.binge.purge | -0.91 [-1.21, -0.61] |
| subtype.restrictive | -0.94 [-1.22, -0.67] |
| depr.symg           | -1.02 [-1.34, -0.71] |
| subtype.durill      | -0.88 [-1.17, -0.59] |
| subtype.testa       | -0.94 [-1.30, -0.58] |

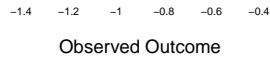

**M\_bankssts\_thickavg**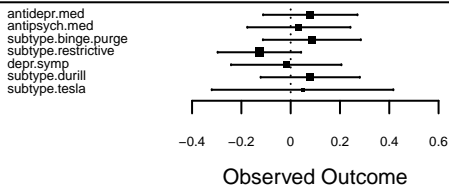**Estimate [95% CI]**

|                     |                     |
|---------------------|---------------------|
| antidepr.med        | 0.08 [-0.11, 0.27]  |
| antipsych.med       | 0.03 [-0.18, 0.24]  |
| subtype.binge.purge | 0.09 [-0.11, 0.28]  |
| subtype.restrictive | -0.13 [-0.30, 0.04] |
| depr.symp           | -0.02 [-0.24, 0.21] |
| subtype.durill      | 0.08 [-0.12, 0.28]  |
| subtype.tesia       | 0.05 [-0.32, 0.42]  |

**M\_caudalanteriorcingulate\_thickavg**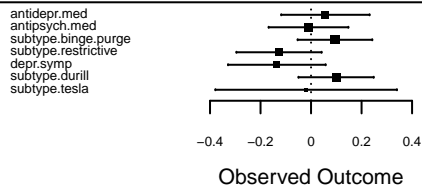**Estimate [95% CI]**

|                     |                     |
|---------------------|---------------------|
| antidepr.med        | 0.06 [-0.12, 0.23]  |
| antipsych.med       | -0.01 [-0.17, 0.15] |
| subtype.binge.purge | 0.09 [-0.05, 0.24]  |
| subtype.restrictive | -0.13 [-0.30, 0.04] |
| depr.symp           | -0.14 [-0.33, 0.06] |
| subtype.durill      | 0.10 [-0.05, 0.25]  |
| subtype.tesia       | -0.02 [-0.38, 0.34] |

**M\_caudalmiddlefrontal\_thickavg**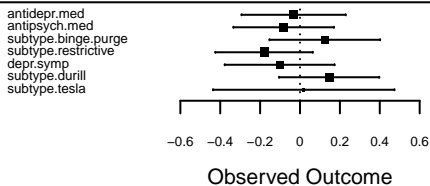**Estimate [95% CI]**

|                     |                     |
|---------------------|---------------------|
| antidepr.med        | -0.03 [-0.29, 0.23] |
| antipsych.med       | -0.08 [-0.33, 0.17] |
| subtype.binge.purge | 0.12 [-0.15, 0.40]  |
| subtype.restrictive | -0.18 [-0.42, 0.06] |
| depr.symp           | -0.10 [-0.38, 0.17] |
| subtype.durill      | 0.15 [-0.10, 0.40]  |
| subtype.tesia       | 0.02 [-0.44, 0.47]  |

**M\_cuneus\_thickavg**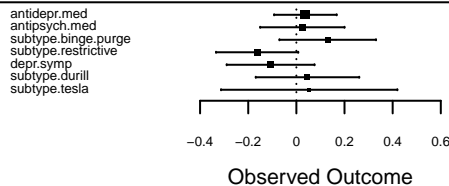**Estimate [95% CI]**

|                     |                     |
|---------------------|---------------------|
| antidepr.med        | 0.04 [-0.09, 0.17]  |
| antipsych.med       | 0.02 [-0.15, 0.20]  |
| subtype.binge.purge | 0.13 [-0.07, 0.33]  |
| subtype.restrictive | -0.16 [-0.35, 0.01] |
| depr.symp           | -0.11 [-0.29, 0.08] |
| subtype.durill      | 0.05 [-0.17, 0.26]  |
| subtype.tesia       | 0.05 [-0.31, 0.42]  |

**M\_entorhinal\_thickavg**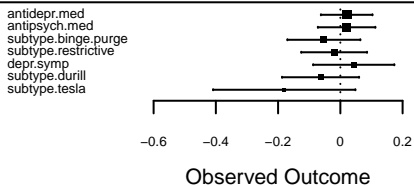**Estimate [95% CI]**

|                     |                     |
|---------------------|---------------------|
| antidepr.med        | 0.02 [-0.06, 0.10]  |
| antipsych.med       | 0.02 [-0.07, 0.11]  |
| subtype.binge.purge | -0.05 [-0.17, 0.06] |
| subtype.restrictive | -0.02 [-0.13, 0.09] |
| depr.symp           | 0.04 [-0.09, 0.17]  |
| subtype.durill      | -0.06 [-0.19, 0.06] |
| subtype.tesia       | -0.18 [-0.41, 0.05] |

**M\_fusiform\_thickavg**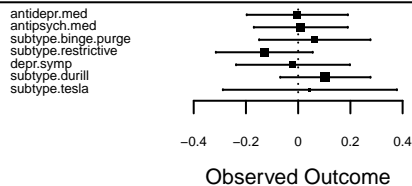**Estimate [95% CI]**

|                     |                     |
|---------------------|---------------------|
| antidepr.med        | -0.00 [-0.20, 0.19] |
| antipsych.med       | 0.01 [-0.17, 0.19]  |
| subtype.binge.purge | 0.06 [-0.15, 0.28]  |
| subtype.restrictive | -0.13 [-0.32, 0.06] |
| depr.symp           | -0.02 [-0.24, 0.20] |
| subtype.durill      | 0.10 [-0.07, 0.28]  |
| subtype.tesia       | 0.04 [-0.29, 0.38]  |

**M\_inferioparietal\_thickavg**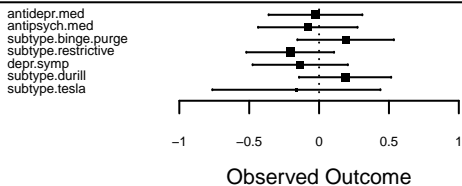**Estimate [95% CI]**

|                     |                     |
|---------------------|---------------------|
| antidepr.med        | -0.03 [-0.36, 0.31] |
| antipsych.med       | -0.08 [-0.44, 0.27] |
| subtype.binge.purge | 0.19 [-0.15, 0.54]  |
| subtype.restrictive | -0.21 [-0.52, 0.11] |
| depr.symp           | -0.13 [-0.48, 0.21] |
| subtype.durill      | 0.19 [-0.14, 0.52]  |
| subtype.tesia       | -0.16 [-0.76, 0.44] |

**M\_inferiortemporal\_thickavg**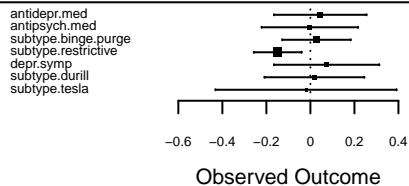**Estimate [95% CI]**

|                     |                      |
|---------------------|----------------------|
| antidepr.med        | 0.04 [-0.17, 0.26]   |
| antipsych.med       | -0.00 [-0.22, 0.22]  |
| subtype.binge.purge | 0.03 [-0.13, 0.18]   |
| subtype.restrictive | -0.15 [-0.26, -0.04] |
| depr.symp           | 0.07 [-0.17, 0.31]   |
| subtype.durill      | 0.02 [-0.21, 0.24]   |
| subtype.tesia       | -0.02 [-0.43, 0.39]  |

**M\_isthmuscingulate\_thickavg**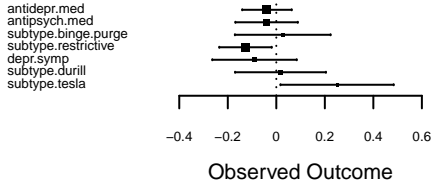**Estimate [95% CI]**

-0.04 [-0.14, 0.06]  
 -0.04 [-0.17, 0.09]  
 0.03 [-0.17, 0.22]  
 -0.13 [-0.23, -0.02]  
 -0.09 [-0.26, 0.08]  
 0.02 [-0.17, 0.20]  
 0.25 [0.02, 0.48]

**M\_lateraloccipital\_thickavg**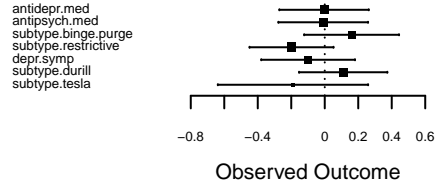**Estimate [95% CI]**

-0.00 [-0.27, 0.26]  
 -0.01 [-0.28, 0.26]  
 0.16 [-0.12, 0.44]  
 -0.20 [-0.45, 0.05]  
 -0.10 [-0.38, 0.18]  
 0.11 [-0.15, 0.37]  
 -0.19 [-0.64, 0.26]

**M\_lateralorbitofrontal\_thickavg**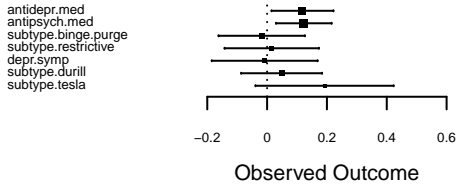**Estimate [95% CI]**

0.12 [0.01, 0.22]  
 0.12 [0.03, 0.22]  
 -0.02 [-0.16, 0.13]  
 0.02 [-0.14, 0.17]  
 -0.01 [-0.19, 0.17]  
 0.05 [-0.09, 0.18]  
 0.19 [-0.04, 0.42]

**M\_lingual\_thickavg**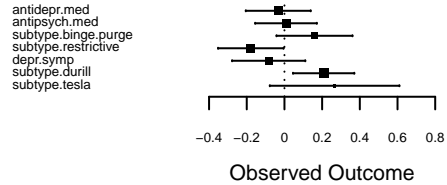**Estimate [95% CI]**

-0.03 [-0.21, 0.14]  
 0.01 [-0.16, 0.17]  
 0.16 [-0.04, 0.36]  
 -0.18 [-0.35, -0.00]  
 -0.08 [-0.28, 0.11]  
 0.21 [0.05, 0.37]  
 0.27 [-0.08, 0.61]

**M\_medialorbitofrontal\_thickavg**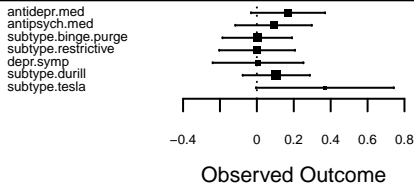**Estimate [95% CI]**

0.17 [-0.03, 0.37]  
 0.09 [-0.12, 0.30]  
 0.00 [-0.19, 0.19]  
 0.00 [-0.20, 0.21]  
 0.01 [-0.24, 0.25]  
 0.11 [-0.08, 0.29]  
 0.37 [-0.00, 0.74]

**M\_middletemporal\_thickavg**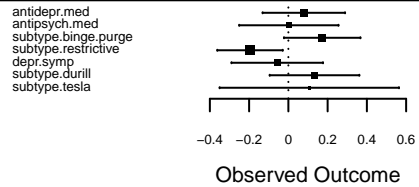**Estimate [95% CI]**

0.08 [-0.13, 0.29]  
 0.00 [-0.25, 0.26]  
 0.17 [-0.02, 0.37]  
 -0.20 [-0.36, -0.03]  
 -0.06 [-0.29, 0.18]  
 0.13 [-0.10, 0.36]  
 0.11 [-0.35, 0.56]

**M\_parahippocampal\_thickavg**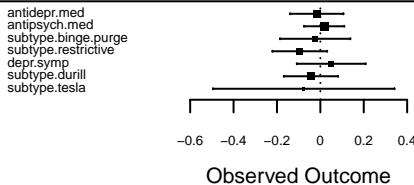**Estimate [95% CI]**

-0.02 [-0.14, 0.11]  
 0.02 [-0.08, 0.11]  
 0.02 [-0.19, 0.14]  
 -0.09 [-0.22, 0.03]  
 0.05 [-0.11, 0.21]  
 -0.04 [-0.17, 0.08]  
 -0.08 [-0.49, 0.34]

**M\_paracentral\_thickavg**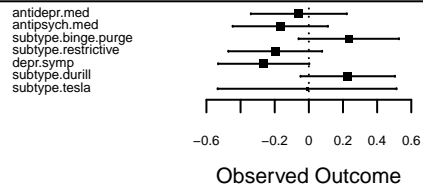**Estimate [95% CI]**

-0.06 [-0.34, 0.22]  
 -0.17 [-0.45, 0.11]  
 0.23 [-0.05, 0.53]  
 -0.20 [-0.47, 0.08]  
 -0.26 [-0.53, 0.00]  
 0.23 [-0.05, 0.50]  
 -0.01 [-0.53, 0.51]

**M\_parsopercularis\_thickavg**

antidepr.med  
 antipsych.med  
 subtype.binge.purge  
 subtype.restrictive  
 depr.symp  
 subtype.durill  
 subtype.tesia

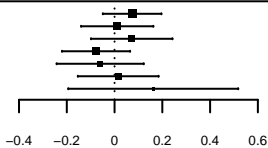

Observed Outcome

**Estimate [95% CI]**

0.07 [-0.05, 0.20]  
 0.01 [-0.14, 0.16]  
 0.07 [-0.10, 0.24]  
 -0.08 [-0.22, 0.06]  
 -0.06 [-0.24, 0.12]  
 0.02 [-0.15, 0.18]  
 0.16 [-0.19, 0.52]

**M\_parsorbitalis\_thickavg**

antidepr.med  
 antipsych.med  
 subtype.binge.purge  
 subtype.restrictive  
 depr.symp  
 subtype.durill  
 subtype.tesia

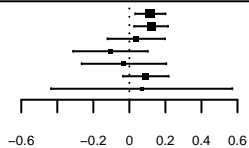

Observed Outcome

**Estimate [95% CI]**

0.12 [0.03, 0.20]  
 0.12 [0.03, 0.21]  
 0.04 [-0.12, 0.20]  
 -0.10 [-0.31, 0.10]  
 -0.03 [-0.26, 0.20]  
 0.09 [-0.03, 0.22]  
 0.07 [-0.43, 0.57]

**M\_parstriangularis\_thickavg**

antidepr.med  
 antipsych.med  
 subtype.binge.purge  
 subtype.restrictive  
 depr.symp  
 subtype.durill  
 subtype.tesia

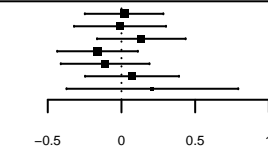

Observed Outcome

**Estimate [95% CI]**

0.02 [-0.25, 0.28]  
 -0.01 [-0.32, 0.30]  
 -0.13 [-0.17, 0.43]  
 -0.16 [-0.44, 0.11]  
 -0.11 [-0.41, 0.19]  
 0.07 [-0.25, 0.39]  
 0.21 [-0.37, 0.79]

**M\_pericalcarine\_thickavg**

antidepr.med  
 antipsych.med  
 subtype.binge.purge  
 subtype.restrictive  
 depr.symp  
 subtype.durill  
 subtype.tesia

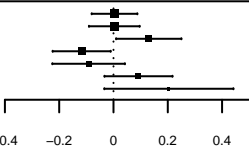

Observed Outcome

**Estimate [95% CI]**

0.00 [-0.08, 0.09]  
 0.00 [-0.09, 0.10]  
 -0.13 [0.01, 0.25]  
 -0.12 [-0.22, -0.01]  
 -0.09 [-0.23, 0.04]  
 0.09 [-0.03, 0.22]  
 0.20 [-0.03, 0.44]

**M\_postcentral\_thickavg**

antidepr.med  
 antipsych.med  
 subtype.binge.purge  
 subtype.restrictive  
 depr.symp  
 subtype.durill  
 subtype.tesia

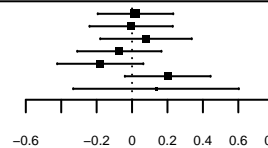

Observed Outcome

**Estimate [95% CI]**

0.02 [-0.19, 0.23]  
 -0.01 [-0.24, 0.23]  
 0.08 [-0.18, 0.34]  
 -0.07 [-0.31, 0.17]  
 -0.18 [-0.42, 0.06]  
 0.20 [-0.04, 0.44]  
 0.14 [-0.33, 0.60]

**M\_posteriorcingulate\_thickavg**

antidepr.med  
 antipsych.med  
 subtype.binge.purge  
 subtype.restrictive  
 depr.symp  
 subtype.durill  
 subtype.tesia

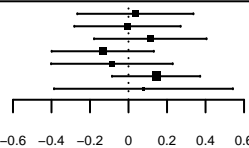

Observed Outcome

**Estimate [95% CI]**

0.04 [-0.27, 0.34]  
 -0.01 [-0.28, 0.27]  
 0.11 [-0.18, 0.41]  
 -0.13 [-0.40, 0.13]  
 -0.09 [-0.40, 0.23]  
 0.14 [-0.09, 0.37]  
 0.08 [-0.39, 0.54]

**M\_precentral\_thickavg**

antidepr.med  
 antipsych.med  
 subtype.binge.purge  
 subtype.restrictive  
 depr.symp  
 subtype.durill  
 subtype.tesia

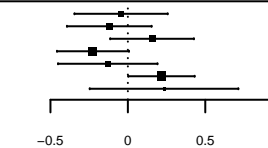

Observed Outcome

**Estimate [95% CI]**

-0.04 [-0.34, 0.26]  
 -0.12 [-0.39, 0.15]  
 0.16 [-0.11, 0.43]  
 -0.23 [-0.46, 0.01]  
 -0.13 [-0.45, 0.19]  
 0.22 [0.00, 0.43]  
 0.23 [-0.25, 0.71]

**M\_precuneus\_thickavg**

antidepr.med  
 antipsych.med  
 subtype.binge.purge  
 subtype.restrictive  
 depr.symp  
 subtype.durill  
 subtype.tesia

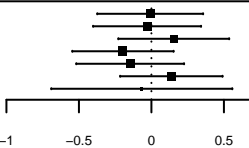

Observed Outcome

**Estimate [95% CI]**

-0.01 [-0.37, 0.36]  
 -0.03 [-0.40, 0.34]  
 0.15 [-0.23, 0.54]  
 -0.20 [-0.55, 0.15]  
 -0.15 [-0.52, 0.23]  
 0.14 [-0.22, 0.49]  
 -0.07 [-0.69, 0.56]

**M\_rostralanteriorcingulate\_thickavg**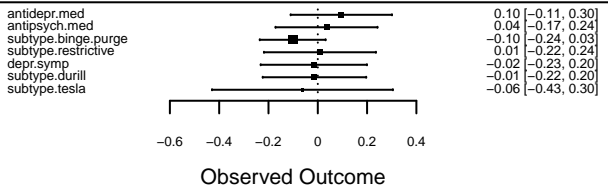**M\_rostralmiddlefrontal\_thickavg**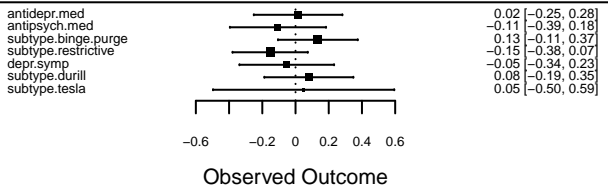**M\_superiorfrontal\_thickavg**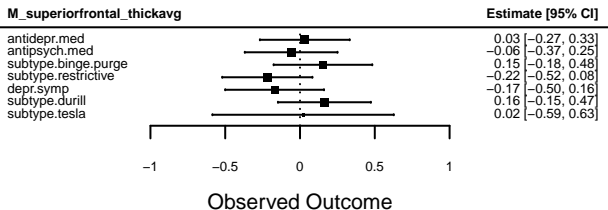**M\_superiorparietal\_thickavg**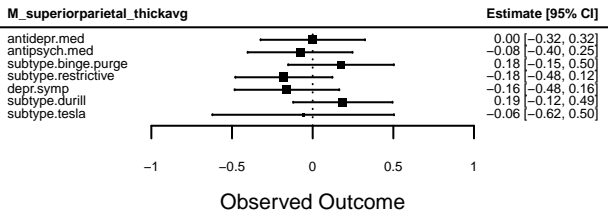**M\_superiortemporal\_thickavg**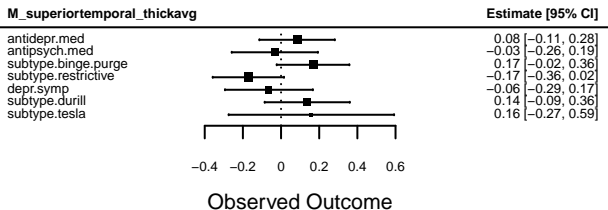**M\_supramarginal\_thickavg**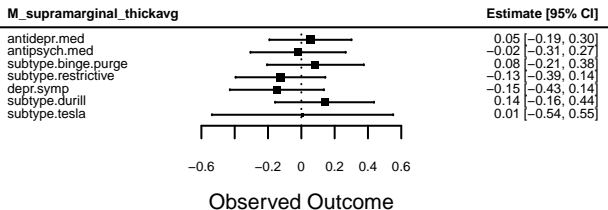**M\_frontalpole\_thickavg**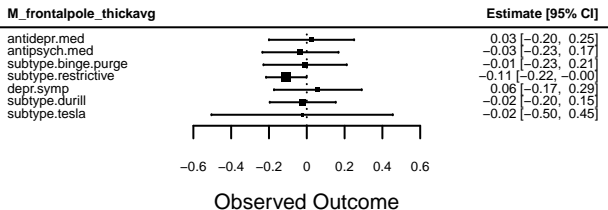**M\_temporalpole\_thickavg**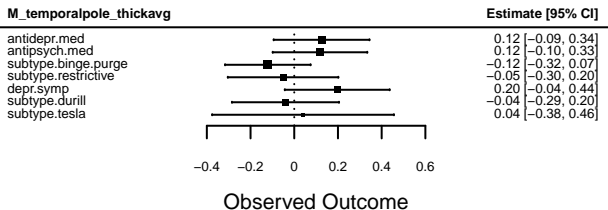

**M\_transversetemporal\_thickavg**

antidepr.med  
 antipsych.med  
 subtype.binge.purge  
 subtype.restrictive  
 depr.symp  
 subtype.durill  
 subtype.tesia

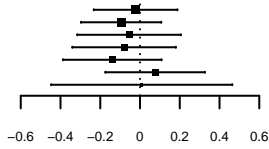

Observed Outcome

**Estimate [95% CI]**

-0.02 [-0.23, 0.19]  
 -0.09 [-0.30, 0.11]  
 -0.05 [-0.32, 0.21]  
 -0.08 [-0.34, 0.18]  
 -0.14 [-0.39, 0.11]  
 0.08 [-0.17, 0.33]  
 0.01 [-0.45, 0.46]

**M\_insula\_thickavg**

antidepr.med  
 antipsych.med  
 subtype.binge.purge  
 subtype.restrictive  
 depr.symp  
 subtype.durill  
 subtype.tesia

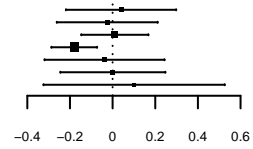

Observed Outcome

**Estimate [95% CI]**

0.04 [-0.22, 0.30]  
 -0.03 [-0.26, 0.21]  
 0.01 [-0.15, 0.17]  
 -0.18 [-0.29, -0.07]  
 -0.04 [-0.32, 0.24]  
 0.00 [-0.24, 0.25]  
 0.10 [-0.32, 0.53]

**MThickness**

antidepr.med  
 antipsych.med  
 subtype.binge.purge  
 subtype.restrictive  
 depr.symp  
 subtype.durill  
 subtype.tesia

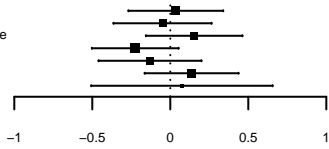

Observed Outcome

**Estimate [95% CI]**

0.04 [-0.27, 0.34]  
 -0.05 [-0.36, 0.26]  
 0.15 [-0.16, 0.46]  
 -0.22 [-0.50, 0.05]  
 -0.13 [-0.46, 0.20]  
 0.14 [-0.16, 0.44]  
 0.07 [-0.51, 0.66]
